# Supplementary material
Source: Springer Nature journal article supplement (https://www.springermedizin.de/resource/supplementary/13023_2013_634_MOESM3_ESM.pdf/9642558)

$^{11}\text{C}$ -Tyr transport from blood to brain  
(ml plasma/g brain tissue/min)

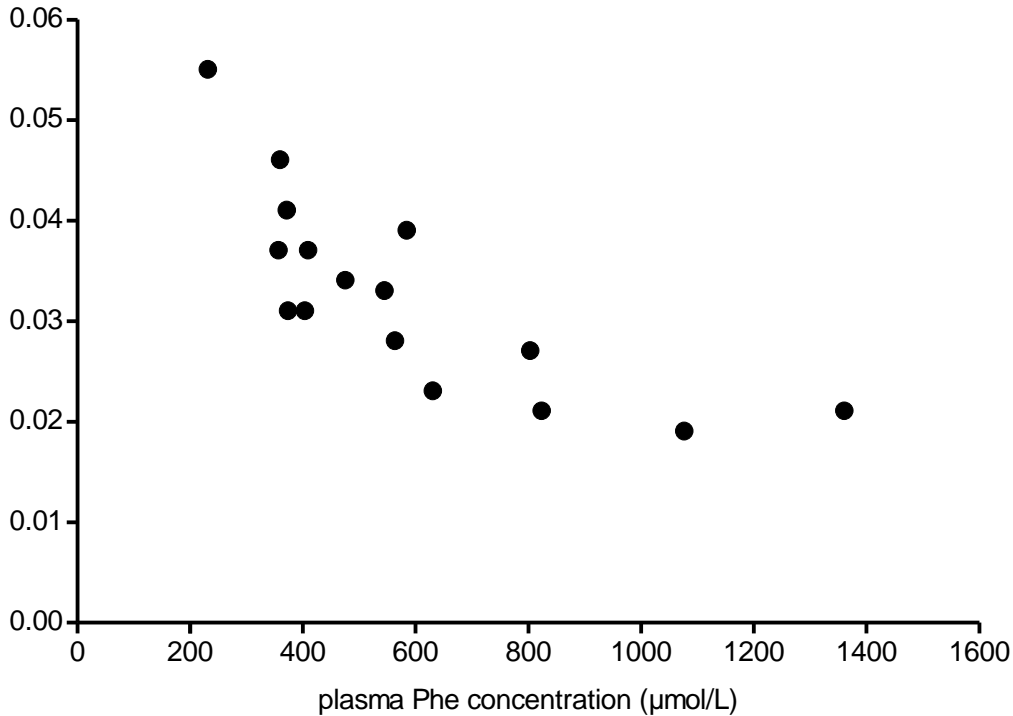

Supplement: MOESM3 [file 9642558]
